# Supplementary material for: Mental awareness improved mild cognitive impairment and modulated gut microbiome
Source: publisher site journal article supplement (doi:10.18632/aging.202277), 2020-12-09
Supplement: Supplementary file [file aging-v12i23-202277-supplementary-material-SD1.pdf]

## SUPPLEMENTARY TABLES

**Supplementary Table 1. Results of the permutational multivariate analysis of variance (PERMANOVA) test comparing MCI and Normal Aging groups.**

| Pairs                   | Sums of Squared | F.Model  | R <sup>2</sup> | Method- Adonis, Bonferroni test |            |
|-------------------------|-----------------|----------|----------------|---------------------------------|------------|
|                         |                 |          |                | p.value                         | p.adjusted |
| Normal Aging vs MAP_TP1 | 1.087745        | 8.338268 | 0.135939       | 0.0002***                       | 0.0012**   |
| Normal Aging vs MAP_TP2 | 0.675926        | 5.531065 | 0.084404       | 0.0002***                       | 0.0012**   |
| Normal Aging vs MAP_TP3 | 1.811868        | 12.74869 | 0.190995       | 0.0002***                       | 0.0012**   |
| MAP_TP1 vs MAP_TP2      | 0.318482        | 3.307593 | 0.086343       | 0.0046**                        | 0.0276*    |
| MAP_TP1 vs MAP_TP3      | 0.188403        | 1.471758 | 0.048299       | 0.1166                          | 0.6996     |
| MAP_TP2 vs MAP_TP3      | 0.828449        | 7.22011  | 0.167054       | 0.0002***                       | 0.0012**   |

Sums of squared, F model, R<sup>2</sup>, p and adjusted p values shown were calculated from the pairwise comparison by the statistical test of PERMANOVA and 4999 permutations based on the Bray-Curtis distance of the relative abundances of bacteria. p and adjusted p values were corrected by Bonferroni test and presented as \*\*\* p ≥ 0.0001 - < 0.001, \*\* p ≥ 0.001 - < 0.01, \* p ≥ 0.01 - < 0.05. MAP= Mindful Awareness Program, TP1= Timepoint 1, TP2= Timepoint 2, TP3= Timepoint 3. Normal Aging; n= 40, MAP\_TP1; n= 15, MAP\_TP2; n= 22, MAP\_TP3; n= 16.

**Supplementary Table 2. Results (p values) of the statistical test of Chao 1 and Shannon of alpha diversity comparing the MAP and Normal Aging groups in pair.**

| Pairs                   | Two-tailed p values |         |
|-------------------------|---------------------|---------|
|                         | Chao 1              | Shannon |
| Normal Aging vs MAP_TP1 | 0.4826              | 0.3156  |
| Normal Aging vs MAP_TP2 | 0.0113*             | 0.9709  |
| Normal Aging vs MAP_TP3 | 0.0177*             | 0.2448  |
| MAP_TP1 vs MAP_TP2      | 0.0356*             | 0.2019  |
| MAP_TP1 vs MAP_TP3      | 0.0405*             | 0.0784  |
| MAP_TP2 vs MAP_TP3      | 0.9651              | 0.2342  |

Two-tailed p values were calculated from the statistical test of unpaired, non-parametric, Mann Whitney U test based on Chao 1 and Shannon indices of alpha-diversity. \* indicates that one variable is significantly different from other counterpart at p < 0.05. MAP= Mindful Awareness Program, TP1= Timepoint 1, TP2= Timepoint 2, TP3= Timepoint 3. Normal Aging; n= 40, MAP\_TP1; n= 15, MAP\_TP2; n= 22, MAP\_TP3; n= 16.

**Supplementary Table 3. Results of permutational multivariate analysis of variance (PERMANOVA) of the gut microbiota using Unifrac distance.**

| Pairs                   | Sums of Squared  |                    | F.Model          |                    | R <sup>2</sup>   |                    | p.value          |                    | p.adjusted       |                    |
|-------------------------|------------------|--------------------|------------------|--------------------|------------------|--------------------|------------------|--------------------|------------------|--------------------|
|                         | Weighted Unifrac | Unweighted Unifrac | Weighted Unifrac | Unweighted Unifrac | Weighted Unifrac | Unweighted Unifrac | Weighted Unifrac | Unweighted Unifrac | Weighted Unifrac | Unweighted Unifrac |
| Normal Aging vs MAP_TP1 | 0.66             | 1.23               | 4.05             | 4.28               | 0.07             | 0.07               | 0.0002***        | 0.0002***          | 0.0012**         | 0.0012**           |
| Normal Aging vs MAP_TP2 | 0.53             | 1.42               | 3.32             | 5.14               | 0.05             | 0.08               | 0.0002***        | 0.0002***          | 0.0012**         | 0.0012**           |
| Normal Aging vs MAP_TP3 | 0.86             | 0.99               | 5.17             | 3.48               | 0.09             | 0.06               | 0.0002***        | 0.0002***          | 0.0012**         | 0.0012**           |
| MAP_TP1 vs MAP_TP2      | 0.21             | 0.36               | 1.53             | 1.42               | 0.04             | 0.04               | 0.0576           | 0.002**            | 0.3456           | 0.012*             |
| MAP_TP1 vs MAP_TP3      | 0.17             | 0.46               | 1.16             | 1.77               | 0.04             | 0.06               | 0.2114           | 0.0006***          | 1                | 0.0036             |
| MAP_TP2 vs MAP_TP3      | 0.44             | 0.53               | 3.02             | 2.11               | 0.08             | 0.06               | 0.0002***        | 0.0002***          | 0.0012**         | 0.0012**           |

Sums of squared, F model, R<sup>2</sup>, p and adjusted p values shown were calculated from the pairwise comparison by the statistical test of PERMANOVA and 4999 permutations based on weighted and unweighted Unifrac distances of the abundances of bacteria. p values and adjusted p values were corrected by Bonferroni test. The significantly differences of pairs are presented as \*\*\* p ≥ 0.0001 - < 0.001, \*\* p ≥ 0.001 - < 0.01, \* p ≥ 0.01 - < 0.05. MAP= Mindful Awareness Program, TP1= Timepoint 1, TP2= Timepoint 2, TP3= Timepoint 3. Normal Aging; n= 40, MAP\_TP1; n= 15, MAP\_TP2; n= 22, MAP\_TP3; n= 16.

**Supplementary Table 4. Ratio of average nutrients consumption between Normal Aging and MCI.**

| Nutrients           | Ratio of average nutrient consumption (Normal Aging/ MCI) |
|---------------------|-----------------------------------------------------------|
| Energy              | 1.327409                                                  |
| Carbohydrate        | 1.337354                                                  |
| Protein             | 1.323174                                                  |
| Total fat           | 1.30519                                                   |
| Saturated fat       | 1.287847                                                  |
| Monounsaturated fat | 1.311511                                                  |
| Polyunsaturated fat | 1.334471                                                  |
| Trans fat           | 1.220319                                                  |
| Starch              | 1.395529                                                  |
| Sugar               | 1.264992                                                  |
| Cholesterol         | 1.348599                                                  |
| Dietary fiber       | 1.195017                                                  |
| Vitamin A           | 1.176913                                                  |
| Vitamin C           | 1.177098                                                  |
| Calcium             | 1.168511                                                  |
| Iron                | 1.278677                                                  |

Ratio of average nutrients consumption between normal aging and MCI were calculated by average nutrients consumption of normal aging group over that of MCI group. The data applied, here, were before Mindful Awareness Program (MAP). MCI= Mild Cognitive Impairment. Normal Aging; n= 77, MCI; n= 46.

**Supplementary Table 5. Fraction of average nutrients consumption relative to energy.**

| <b>Nutrients/Energy</b>    | <b>Normal Aging</b> | <b>MCI</b> |
|----------------------------|---------------------|------------|
| Energy/Energy              | 1                   | 1          |
| Carbohydrate/Energy        | 0.13                | 0.13       |
| Protein/Energy             | 0.04                | 0.04       |
| Total fat/Energy           | 0.03                | 0.03       |
| Saturated fat/Energy       | 0.01                | 0.01       |
| Monounsaturated fat/Energy | 0.01                | 0.01       |
| Polyunsaturated fat/Energy | 0.01                | 0.01       |
| Trans fat/Energy           | 1.03                | <0.01      |
| Starch/Energy              | 0.09                | 0.08       |
| Sugar/Energy               | 0.04                | 0.04       |
| Cholesterol/Energy         | 0.12                | 0.12       |
| Dietary fiber/Energy       | 0.01                | 0.01       |
| Vitamin A/Energy           | 0.43                | 0.49       |
| Vitamin C/Energy           | 0.06                | 0.07       |
| Calcium/Energy             | 0.34                | 0.39       |
| Iron/Energy                | 0.01                | 0.01       |

Fractions of average nutrients consumption were calculated using the same denominator of energy of each group. MCI= Mild Cognitive Impairment. Normal Aging; n= 77, MCI; n= 46.

**Supplementary Table 6. Results (p values) of the statistical test of neuropsychological tests comparing the MCI and Normal Aging groups in pair.**

| <b>Neuropsychological tests</b> | <b>Recognition Trial</b> | <b>Delayed Recall</b> | <b>Memory Domain</b> | <b>Digit Span Backward</b> | <b>Color Trails Test 2</b> | <b>Block Design</b> | <b>Semantic Fluency Span</b> |
|---------------------------------|--------------------------|-----------------------|----------------------|----------------------------|----------------------------|---------------------|------------------------------|
| Normal Aging vs MAP_TP1         | 0.022*                   | 0.0176*               | 0.008**              | <0.0001****                | <0.0001****                | 0.001**             | <0.0001****                  |
| Normal Aging vs MAP_TP2         | 0.729                    | 0.557                 | 0.847                | <0.0001****                | <0.0001****                | 0.0108*             | 0.0002***                    |
| Normal Aging vs MAP_TP3         | 0.148                    | 0.871                 | 0.761                | 0.0002***                  | <0.0001****                | 0.0084*             | 0.0024*                      |
| MAP_TP1 vs MAP_TP2              | 0.0306*                  | 0.104                 | 0.0365*              | 0.480                      | 0.272                      | 0.260               | 0.528                        |
| MAP_TP1 vs MAP_TP3              | 0.529                    | 0.137                 | 0.291                | 0.536                      | 0.836                      | 0.612               | 0.620                        |
| MAP_TP2 vs MAP_TP3              | 0.153                    | 0.904                 | 0.642                | 0.271                      | 0.770                      | 0.504               | 0.995                        |

Two-tailed p values were calculated from the statistical test of unpaired, non-parametric, Mann Whitney U test for the neuropsychological tests. The significantly differences of pairs are presented as \*\*\*\* p < 0.0001, \*\*\* p ≥ 0.0001 - < 0.001, \*\* p ≥ 0.001 - < 0.01, \* p ≥ 0.01 - < 0.05. MAP= Mindful Awareness Program, TP1= Timepoint 1, TP2= Timepoint 2, TP3= Timepoint 3. Normal Aging; n= 40, MAP\_TP1; n= 28, MAP\_TP2; n= 27, MAP\_TP3; n= 18.

**Supplementary Table 7. Results (p values) of the statistical test of telomere length measured at different intervention points of MAP comparing the timepoints in pair.**

| <b>Pairs</b>                | <b>p values</b> |
|-----------------------------|-----------------|
| Timepoint 1 vs. Timepoint 2 | 0.0001***       |
| Timepoint 1 vs. Timepoint 3 | 0.3303          |
| Timepoint 2 vs. Timepoint 3 | 0.0067**        |

Two-tailed p values were calculated from the statistical test of paired, non-parametric, Wilcoxon matched-pair signed rank test based on the telomere length of MAP comparing the different time points. The significantly differences of pairs are presented as \*\*\* p ≥ 0.0001 - < 0.001, \*\* p ≥ 0.001 - < 0.01. MAP= Mindful Awareness Program. n= 15 for each timepoints.

**Supplementary Table 8. Results (p values) of the statistical test of three plasma biomarkers comparing the MAP and Normal Aging groups in pair.**

| Pairs                   | (1) BDNF    | (2) DHEAS | (3) hs-CRP |
|-------------------------|-------------|-----------|------------|
| Normal Aging vs MAP_TP1 | <0.0001**** | 0.7348    | 0.3065     |
| Normal Aging vs MAP_TP2 | 0.093       | 0.7673    | 0.7154     |
| Normal Aging vs MAP_TP3 | 0.0169*     | 0.3373    | 0.1486     |
| MAP_TP1 vs MAP_TP2      | 0.0076**    | 0.6768    | 0.4738     |
| MAP_TP1 vs MAP_TP3      | 0.0959      | 0.3385    | 0.0351*    |
| MAP_TP2 vs MAP_TP3      | 0.2567      | 0.5032    | 0.2999     |

Two-tailed p values were calculated from the statistical test of unpaired, non-parametric, Mann Whitney U test for three plasma biomarkers. The significantly differences of pairs are presented as \*\*\*\* p < 0.0001, \*\*\* p ≥ 0.0001 - < 0.001, \*\* p ≥ 0.001 - < 0.01, \* p ≥ 0.01 - < 0.05. BDNF= Brain derived neurotrophic factor, DHEAS= Dehydroepiandrosterone sulfate, hs-CRP= high sensitive C-reactive protein, MAP= Mindful Awareness Program, TP1= Timepoint 1, TP2= Timepoint 2, TP3= Timepoint 3. Normal Aging (n= 40,40,40), MAP\_TP1 (n= 21,21,21), MAP\_TP2 (n= 23,24,23), MAP\_TP3 (n= 14,16,15).

**Supplementary Table 9. Results (p values) of the statistical test of fecal water cytokines comparing the MAP and Normal Aging groups in pair.**

| Pairs                   | IL-1β      | IL-2   | IL-4    | IL-5     | IL-6  | IL-8    | IL-10    | IL-12    | TNFα    | IFNγ   | GM-CSF  |
|-------------------------|------------|--------|---------|----------|-------|---------|----------|----------|---------|--------|---------|
| Normal Aging vs MAP_TP1 | 0.0001**** | 0.0704 | 0.3525  | 0.0065** | 0.102 | 0.0342* | 0.0045** | 0.0664   | 0.0862  | 0.9405 | 0.7697  |
| Normal Aging vs MAP_TP2 | 0.0181*    | 0.1878 | 0.1291  | 0.0536   | 0.441 | 0.09    | 0.0147*  | 0.0016** | 0.0404* | 0.2418 | 0.9315  |
| Normal Aging vs MAP_TP3 | 0.6581     | 0.683  | 0.4117  | 0.0457*  | 0.915 | 0.203   | 0.1289   | 0.0764   | 0.3665  | 0.3822 | 0.4695  |
| MAP_TP1 vs MAP_TP2      | 0.2437     | 0.9508 | >0.9999 | 0.5148   | 0.463 | 0.845   | >0.9999  | 0.0622   | 0.6327  | 0.1669 | >0.9999 |
| MAP_TP1 vs MAP_TP3      | 0.0066**   | 0.5938 | 0.0545  | 0.6922   | 0.465 | 0.624   | 0.3333   | 0.6685   | 0.3813  | 0.468  | 0.5118  |
| MAP_TP2 vs MAP_TP3      | 0.0971     | 0.5897 | 0.0556  | >0.9999  | 0.757 | 0.907   | 0.4      | 0.1529   | 0.2265  | 0.0617 | 0.6473  |

Two-tailed p values were calculated from the statistical test of unpaired, non-parametric, Mann Whitney U test for 11 fecal water cytokines. The significantly differences of pairs are presented as \*\*\* p ≥ 0.0001 - < 0.001, \*\* p ≥ 0.001 - < 0.01, \* p ≥ 0.01 - < 0.05. MAP= Mindful Awareness Program, TP1= Timepoint 1, TP2= Timepoint 2, TP3= Timepoint 3, IL= Interleukin, IL-1β= Interleukin-1 beta, TNFα= Tumor necrosis factor alpha, IFNγ= Interferon gamma, GM-CSG= Granulocyte-macrophage colony-stimulating factor. Normal Aging; n= 29, MAP\_TP1; n= 28, MAP\_TP2; n= 21, MAP\_TP3; n= 14.

**Supplementary Table 10. Results of correlation between fecal bacterial genus abundance (>1% total OTUs) and Z scores of neuropsychological tests among all MAP groups.**

| <b>Spearman r correlation coefficient</b> | <b>Delayed Recall</b> | <b>Recognition Trial</b> | <b>Memory Domain</b> | <b>Digit Span Backward</b> | <b>Color Trails Test 2</b> | <b>Block Design</b> | <b>Semantic Fluency Span</b> |
|-------------------------------------------|-----------------------|--------------------------|----------------------|----------------------------|----------------------------|---------------------|------------------------------|
| <i>Bacteroides</i>                        | 0.13                  | 0.13                     | 0.18                 | 0.01                       | -0.13                      | -0.10               | -0.01                        |
| <i>Lachnospiraceae_UG</i>                 | -0.08                 | -0.02                    | 0.01                 | -0.14                      | -0.10                      | 0.04                | 0.06                         |
| <i>Blautia</i>                            | 0.00                  | -0.09                    | -0.09                | -0.10                      | 0.16                       | -0.01               | 0.01                         |
| <i>Ruminococcaceae_UG</i>                 | -0.02                 | -0.13                    | -0.12                | 0.37**                     | 0.01                       | -0.05               | 0.27                         |
| <i>Faecalibacterium</i>                   | 0.00                  | -0.09                    | -0.09                | 0.09                       | 0.00                       | 0.25                | 0.24                         |
| <i>Ruminococcus</i>                       | 0.21                  | 0.35**                   | 0.31*                | 0.42***#                   | 0.10                       | 0.18                | 0.44***#                     |
| <i>Prevotella</i>                         | -0.15                 | -0.14                    | -0.19                | 0.07                       | 0.13                       | 0.26                | -0.02                        |
| <i>Enterobacteriaceae_UG</i>              | -0.04                 | -0.03                    | 0.00                 | 0.06                       | -0.08                      | -0.28*              | -0.29*                       |
| Clostridiales_UF_UG                       | -0.21                 | -0.12                    | -0.22                | 0.02                       | 0.01                       | -0.10               | -0.14                        |
| <i>Coprococcus</i>                        | -0.05                 | -0.02                    | -0.11                | 0.29*                      | 0.45***#                   | 0.29*               | 0.22                         |
| <i>Dorea</i>                              | -0.24                 | -0.01                    | -0.15                | -0.26                      | -0.06                      | -0.25               | -0.25                        |
| <i>Bifidobacterium</i>                    | 0.16                  | 0.02                     | 0.07                 | -0.13                      | -0.05                      | -0.05               | 0.15                         |
| <i>Lachnospira</i>                        | -0.10                 | -0.01                    | -0.03                | 0.00                       | -0.12                      | -0.14               | 0.00                         |
| <i>Akkermansia</i>                        | 0.01                  | -0.03                    | 0.03                 | 0.06                       | 0.06                       | -0.19               | -0.16                        |
| <i>Parabacteroides</i>                    | 0.05                  | 0.08                     | 0.08                 | 0.29*                      | 0.06                       | 0.09                | 0.28*                        |
| <i>Streptococcus</i>                      | 0.26                  | 0.00                     | 0.15                 | -0.13                      | -0.13                      | -0.10               | 0.02                         |
| <i>Oscillospira</i>                       | -0.19                 | 0.00                     | -0.14                | 0.13                       | 0.06                       | -0.09               | -0.05                        |
| <i>Fusobacterium</i>                      | 0.17                  | 0.16                     | 0.24                 | -0.30*                     | -0.30*                     | -0.27               | -0.26                        |
| <i>Rikenellaceae_UG</i>                   | -0.14                 | -0.04                    | -0.12                | 0.05                       | 0.12                       | -0.04               | 0.01                         |
| Clostridiales;Other;Other                 | 0.17                  | 0.19                     | 0.23                 | 0.12                       | -0.02                      | -0.01               | 0.02                         |
| <i>Clostridiaceae_UG</i>                  | 0.11                  | -0.05                    | 0.09                 | 0.03                       | 0.04                       | 0.04                | 0.00                         |
| <i>Phascolarctobacterium</i>              | -0.19                 | -0.20                    | -0.28*               | -0.07                      | 0.05                       | -0.05               | -0.15                        |
| <i>Megamonas</i>                          | 0.21                  | 0.27                     | 0.22                 | 0.20                       | 0.13                       | 0.18                | 0.15                         |
| <i>Lactobacillus</i>                      | 0.22                  | 0.18                     | 0.23                 | 0.12                       | -0.03                      | -0.03               | 0.25                         |

Spearman rho (r) values derived from non-parametric Spearman correlation test were described. Three timepoints of MAP were included in calculation of correlation between 1% of fecal bacterial genus and Z scores of neuropsychological tests. The significantly different correlations are represented as \*\*\*  $p \geq 0.0001 - < 0.001$ , \*\*  $p \geq 0.001 - < 0.01$ , \*  $p \geq 0.01 - < 0.05$ . The two-tailed p values were corrected by false discovery rate using the Benjamini and Hochberg method and q values are represented as #  $q \geq 0.01 - < 0.05$ . MAP= Mindful Awareness Program, UG= Unknown genus, UF= Unknown family.
